# Supplementary material for: Solution-processable hypercrosslinked polymers by low cost strategies: a promising platform for gas storage and separation
Source: Royal Society of Chemistry journal article supplement (doi:10.1039/c6ta05226f), 2016-01-01
Supplement: c6ta05226f1.pdf [file c6ta05226f1.pdf]

Electronic Supplementary Material (ESI) for Journal of Materials Chemistry A.  
This journal is © The Royal Society of Chemistry 2016

## **Electronic Supplementary Information**

### **Solution-processable hypercrosslinked polymers by low cost strategies: a promising platform for gas storage and separation**

Yuwan Yang,<sup>a</sup> Bien Tan<sup>\*a</sup> and Colin D Wood<sup>\*b</sup>

*<sup>a</sup> School of Chemistry and Chemical Engineering, Huazhong University of  
Science and Technology, Wuhan, 430074, China.*

*Email: bien.tan@mail.hust.edu.cn*

*<sup>b</sup> CSIRO, Energy, Australian Resources Research Centre, Kensington, 6151  
Western Australia, Australia.*

*Email: colin.wood@csiro.au*

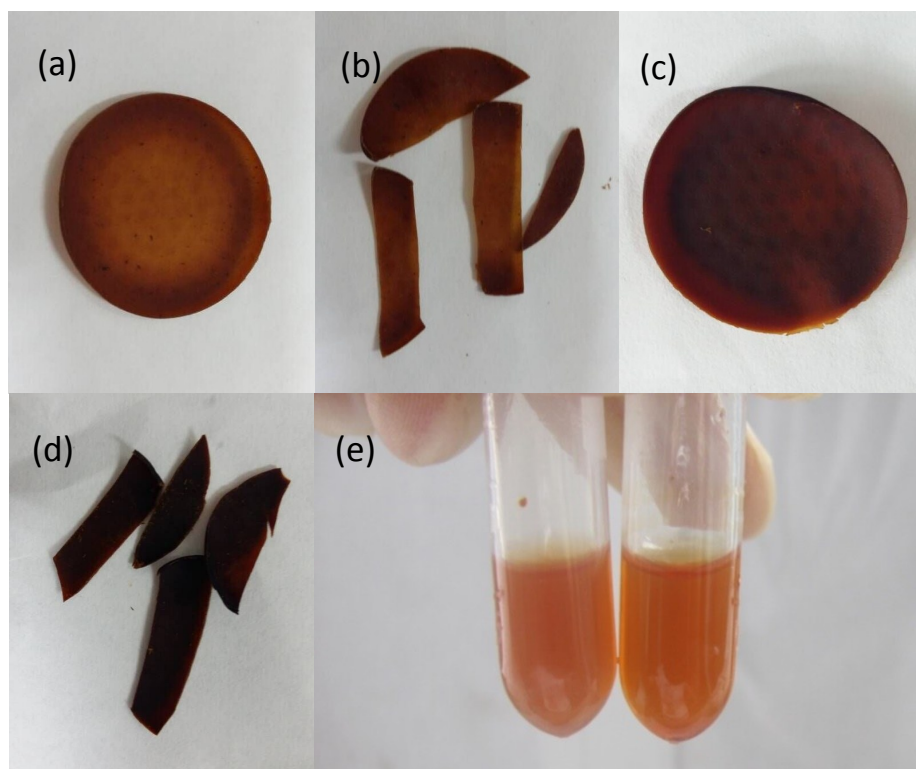

**Figure S1** Photographs of insoluble HCP-1 (a) and HCP-2 (c) after filtrating, and small pieces of HCP-1 (b) and HCP-2 (d). Both materials swell in THF (e).

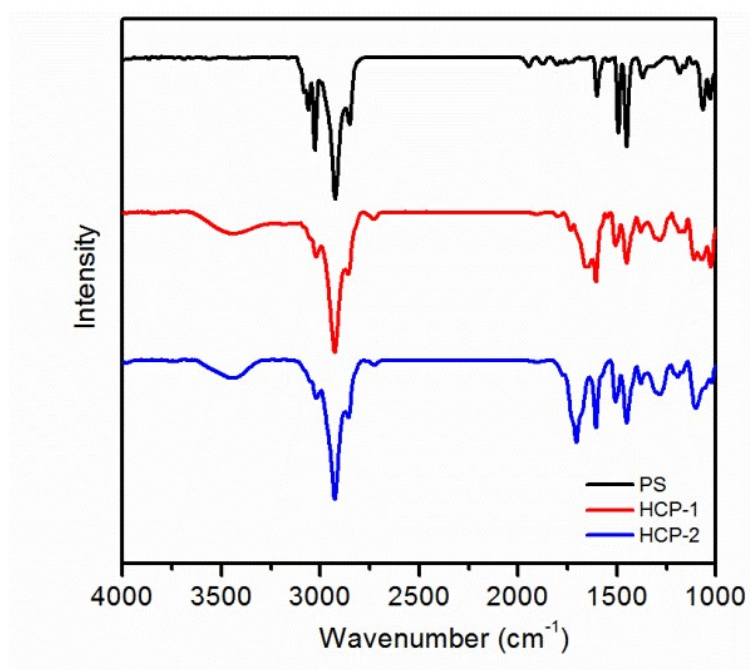

**Figure S2** FTIR spectra of PS, HCP-1 and HCP-2.

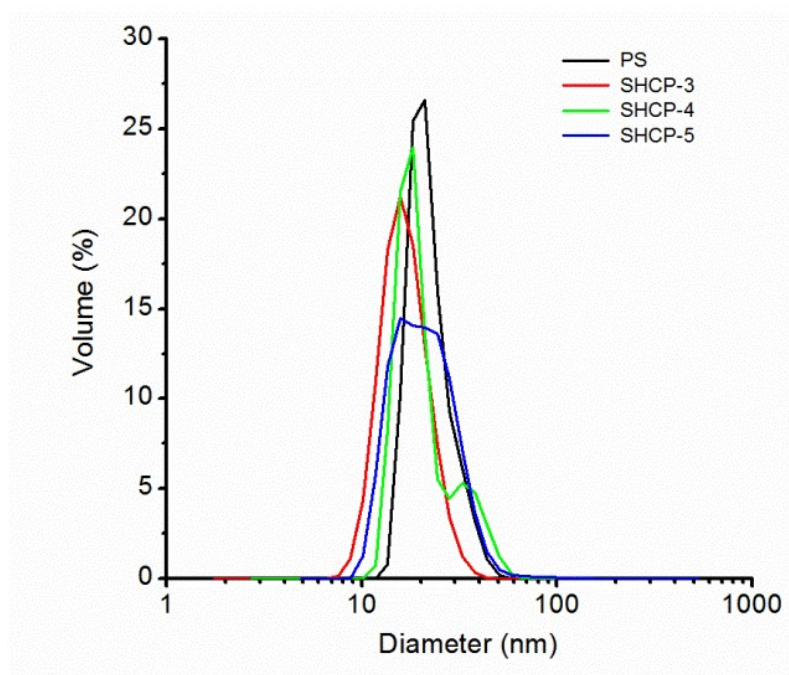

**Figure S3** DLS curves of PS and SHCPs. Solvent: tetrahydrofuran.

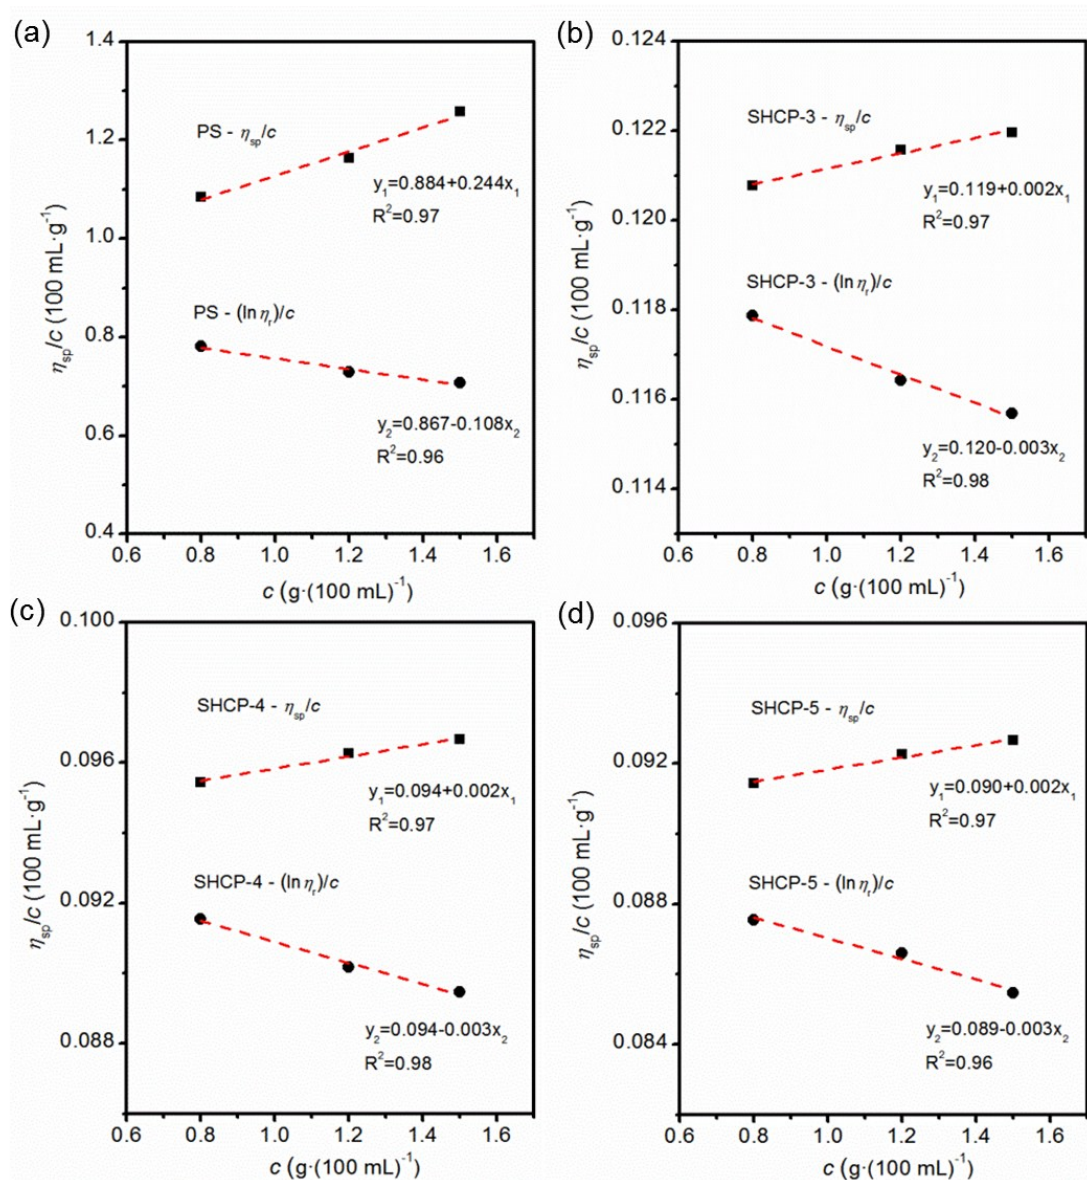

**Figure S4** The intrinsic viscosity of PS and SHCPs. Solvent: tetrahydrofuran.



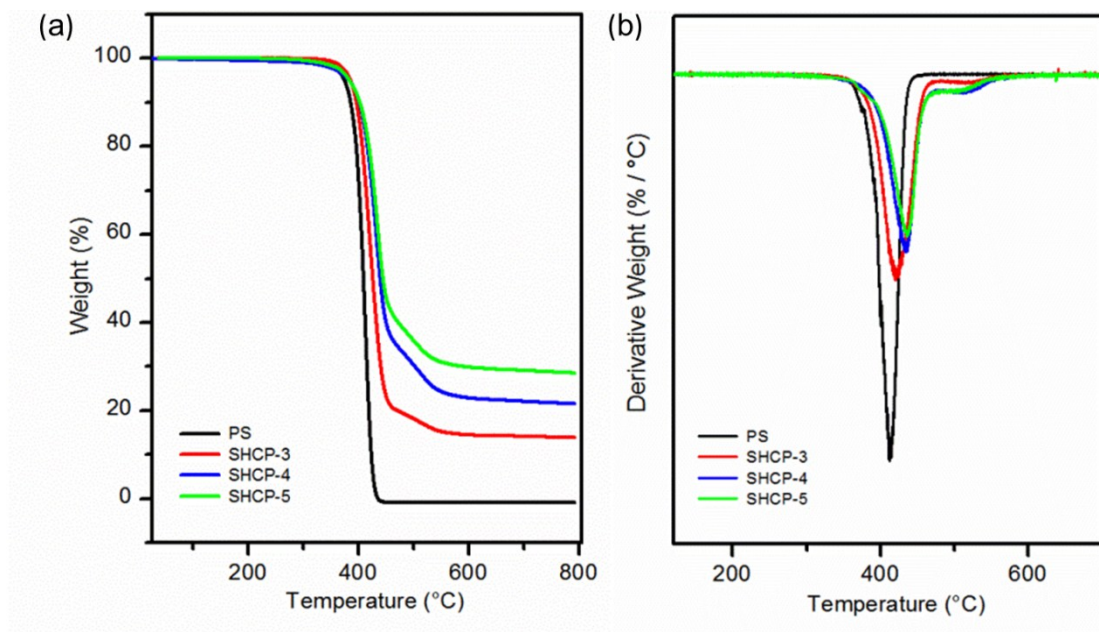

**Figure S5** TG (a) and DTA (b) curves of PS and SHCPs at a heating rate of 10 °C/min under nitrogen atmosphere.

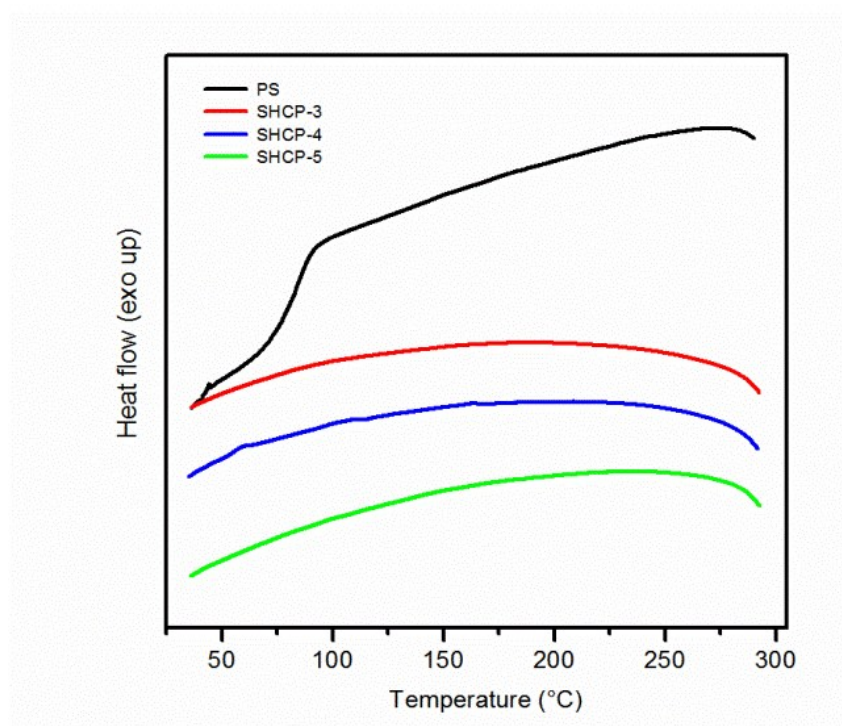

**Figure S6** DSC curves of PS and SHCPs at a heating rate of 10 °C/min under nitrogen atmosphere.

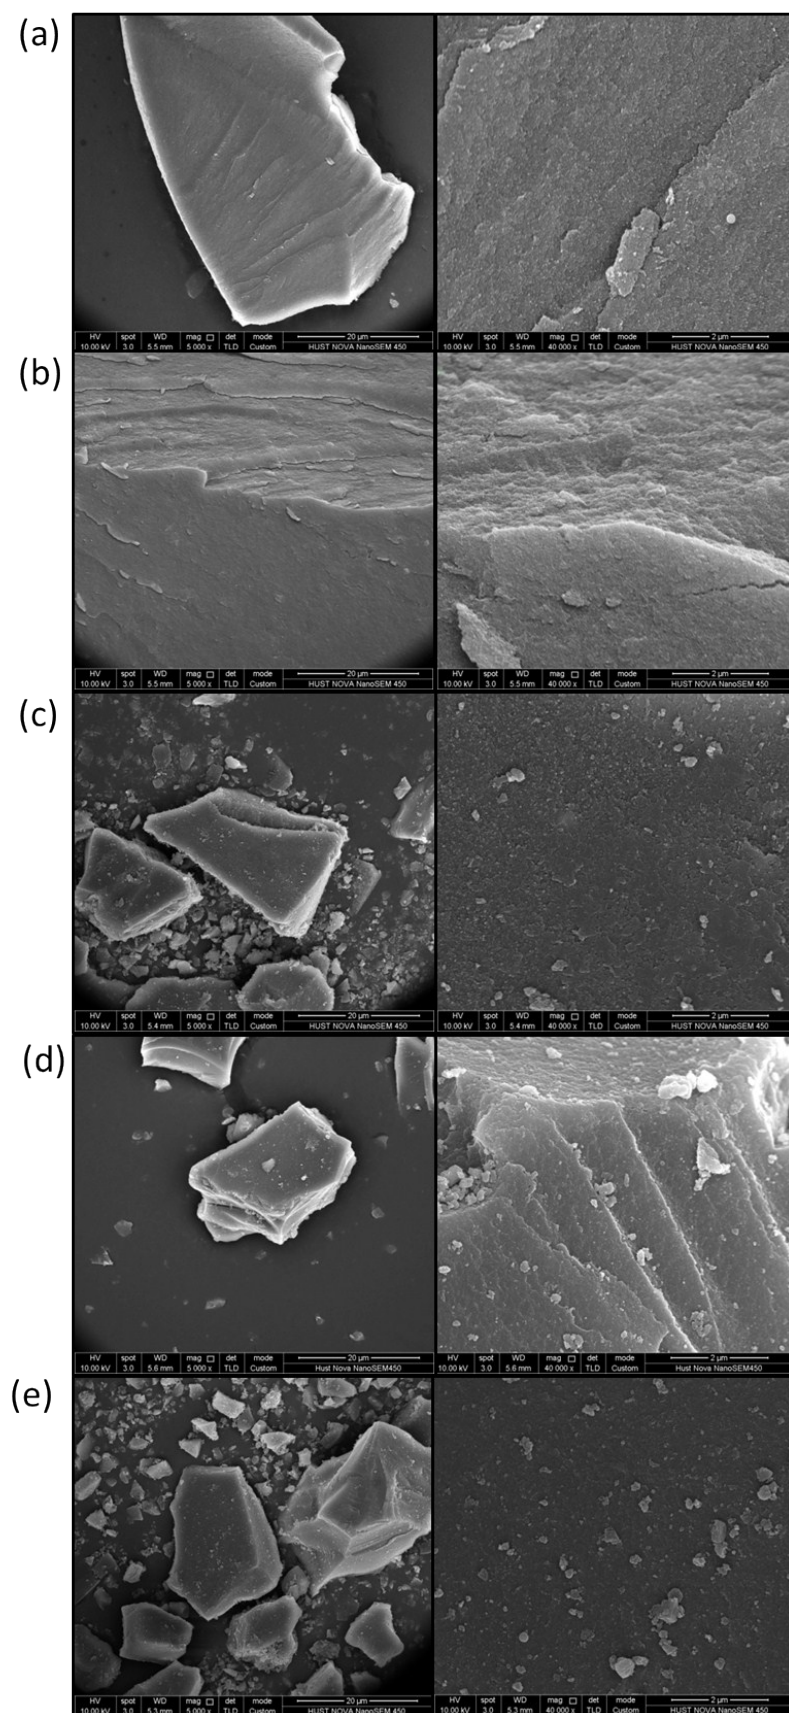

**Figure S7** SEM image of the HCP-1 (a), HCP-2 (b), SHCP-3 (c), SHCP-4 (d) and SHCP-5 (e), scale bar: 20 μm (left), 2 μm (right).

**Table S1** Reaction conditions for HCPs and SHCPs. The total volume of solvent was 450 mL in each reaction, for samples 3, 4 and 5 the cross-linker (FDA) was slowly added in a 50 mL solution.

| Sample | PS<br>(g) | FDA<br>( $\mu$ L) | FeCl <sub>3</sub><br>(g) | S <sub>BET</sub> <sup>a)</sup><br>(m <sup>2</sup> g <sup>-1</sup> ) |
|--------|-----------|-------------------|--------------------------|---------------------------------------------------------------------|
| HCP-1  | 0.10      | 270               | 1.22                     | 981                                                                 |
| HCP-2  | 0.22      | 580               | 1.08                     | 1125                                                                |
| SHCP-3 | 0.05      | 270               | 0.60                     | 187                                                                 |
| SHCP-4 | 0.52      | 270               | 0.60                     | 480                                                                 |
| SHCP-5 | 0.52      | 500               | 0.60                     | 724                                                                 |

<sup>a)</sup>surface area for the complete sample, the surface area for the soluble component is shown in table S2.

**Table S2** The weight of sedimentations of SHCPs.

| Sample | M <sub>1</sub> <sup>a)</sup><br>(g) | M <sub>2</sub> <sup>b)</sup><br>(g) | f <sup>c)</sup><br>(%) | S <sub>BET</sub> <sup>d)</sup><br>(m <sup>2</sup> g <sup>-1</sup> ) |
|--------|-------------------------------------|-------------------------------------|------------------------|---------------------------------------------------------------------|
| SHCP-3 | 0                                   | 0.0500                              | 100                    | 158                                                                 |
| SHCP-4 | 0.0110                              | 0.0390                              | 78                     | 355                                                                 |
| SHCP-5 | 0.0353                              | 0.0147                              | 29                     | 530                                                                 |

<sup>a)</sup>The weight of sedimentations; <sup>b)</sup>The weight which dissolved in chloroform; <sup>c)</sup>M<sub>2</sub>/(M<sub>1</sub>+M<sub>2</sub>)\*100%, weight fractions of soluble part; <sup>d)</sup>Apparent surface area of soluble fractions calculated from nitrogen adsorption isotherms at 77.3 K using BET equation.

**Table S3** Molecular weight and polydispersity index of SHCPs.

| Sample | S <sub>BET</sub><br>(m <sup>2</sup> g <sup>-1</sup> ) | M <sub>w</sub> | M <sub>n</sub> | PDI  |
|--------|-------------------------------------------------------|----------------|----------------|------|
| PS     | 0                                                     | 167700         | 65600          | 2.56 |
| SHCP-3 | 187                                                   | 145000         | 65600          | 2.21 |
| SHCP-4 | 480                                                   | 177500         | 98000          | 1.81 |
| SHCP-5 | 724                                                   | 173300         | 106500         | 1.63 |
